## $\beta$ -Catenin gain of function in muscles impairs neuromuscular junction formation

Haitao Wu, Yisheng Lu, Arnab Barik, Anish Joseph, Makoto Mark Taketo, Wen-Cheng Xiong and Lin Mei

There was an error published in *Development* 139, 2392-2404.

In Fig. 5F, two of the panels (bottom left and top right) were misplaced and therefore attributed to the wrong genotype. The correct Fig. 5F appears below.

The authors apologise to readers for this mistake.

**F**

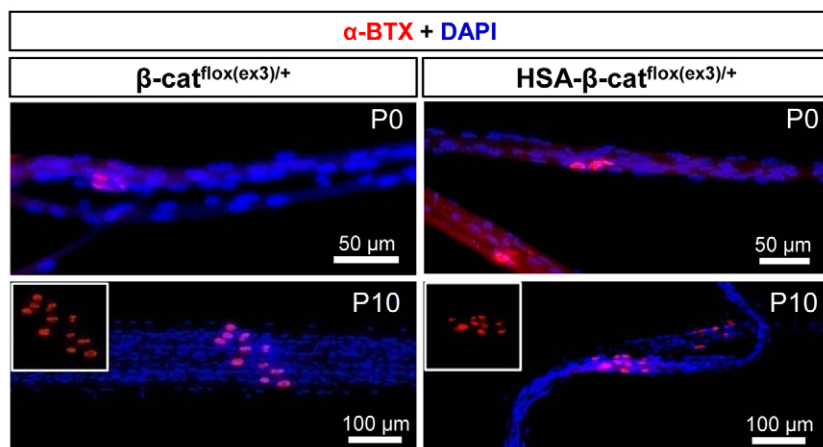

Source: https://cob.silverchair.com/dev/article-pdf/139/14/2636/1389073/2636.pdf
